# Supplementary material for: An Evolution From a Predominant K1 Allelic Variant to MAD20 of msp1 Gene Between 2015 to 2019 in Metehara, Southeast Ethiopia
Source: Research Square preprint supplement (doi:10.21203/rs.3.rs-1102722/v1), 2021-12-16
Supplement: Supplementary file 1 [file 7c19e614c40950bb7bbda854.docx]

Additional files 2: (supplementary Table 2) Table S2: Summary of the *P. falciparum* isolates collected between 2015 and 2019 Metehara, South east, Ethiopia.

| **Year** | **Total sample collected (n)** | **Microscopy and RDT positive (n%)** | **quantitative PCR (qPCR) (n%)** |
| --- | --- | --- | --- |
| 2015 | 33 | 31(93.9) | 29(87.9) |
| 2019 | 50 | 37(74.0) | 41(82.0) |
| Total | 83 | 68(81.9) | 70(84.3) |

***n (%) is number of positives**
