# Supplementary material for: An Evolution From a Predominant K1 Allelic Variant to MAD20 of msp1 Gene Between 2015 to 2019 in Metehara, Southeast Ethiopia
Source: Research Square preprint supplement (doi:10.21203/rs.3.rs-1102722/v1), 2021-12-16
Supplement: Supplementary file 2 [file a1b3206e2ea38a4e44302adf.docx]

Additional files 1: (supplementary Table 1) Table S1. The primers used to genotype the *msp1, msp2* and *glurp* polymorphic regions of *P. falciparum* isolates from Metehara, South east Ethiopia.

| Primer used | sequence |
| --- | --- |
| M1-OF | 5’-CTA GAA GCT TTA GAA GAT GCA GTA TTG-3’ |
| M1-OR | 5’-CTT AAA TAG TAT TCT AAT TCA AGT GGA-3’ |
| M1-KF | 5’-AATGAA GAAGAA ATT ACT ACA AAA GGT-3’ |
| M1-KR | 5’-GCT TGC ATC AGC TGG AGG GCTTGC ACC-3’ |
| M1-RF | 5’-TAAAGGATG GAGCAAATACTCAAGTTG-3’ |
| M1-RR | 5’-CATCTGAAGGATTTGCAGCACCTG GAG-3’ |
| M1-MF | 5’-AAA TGAAGGAACAAGTGGAACAGCTGT-3’ |
| MI-MR | 5’-ATCTGAAGGATTTGTACGTCTTGAATT-3’ |
| M2-OF | 5’-ATGAAGGTAATTAADACATTGTCTATT-3’ |
| M2-OR | 5’-CTTTGTTACCATCGGTACATTCTT-3’ |
| FC27-B1 | 5’-GCAAATGAAGGTTCTAATACTAATAG-3’ |
| FC27-B2 | 5’-GCTTTGGGTCCTTCTTCAGTTGATTC-3’ |
| IC/3D7-A1 | 5’-GCAGAAAGTAAG CCTTCTACTGGTGCT-3’ |
| IC/3D7-A2 | 5’-GATTTGTTTCGGCATTATTATGA-3’ |
| G-OF | 5’-TGAATTTGAAGATGTTCACACTGAAC-3’ |
| G-OR | 5’-GTG GAA TTG CTTTTTCTTCAACACTAA-3’ |
| G-NF | 5’TGAATTTGAAGA TGT TCA CAC TGA AC-3’ |
| G-OR | 5’-GTG GAA TTGCTTTTT CTT CAACACTAA-3’ |
